# Supplementary material for: Long-term behavior and stability of calibration models for NO and NO 2 low cost sensors
Source: Copernicus journal article supplement (doi:10.5194/amt-2021-433), 2022-01-05
Supplement: Supplementary file 1 [file amt-2021-433-supplement.pdf]

# Supplement of

## Long-term behavior and stability of calibration models for NO and NO<sub>2</sub> low cost sensors

Horim Kim<sup>1</sup>, Michael Müller<sup>1,2</sup>, Stephan Henne<sup>1</sup>, and Christoph Hüglin<sup>1</sup>

<sup>1</sup>Laboratory for Air Pollution and Environmental Technology, Empa, 8600 Dübendorf, Switzerland

<sup>2</sup>now at: Amt für Geoinformation, Kanton Basel-Landschaft, 4410 Liestal, Switzerland.

**Correspondence:** Christoph Hüglin (christoph.hueglin@empa.ch)

### S-1 Site description

#### S-1.1 Harkingen Monitoring station

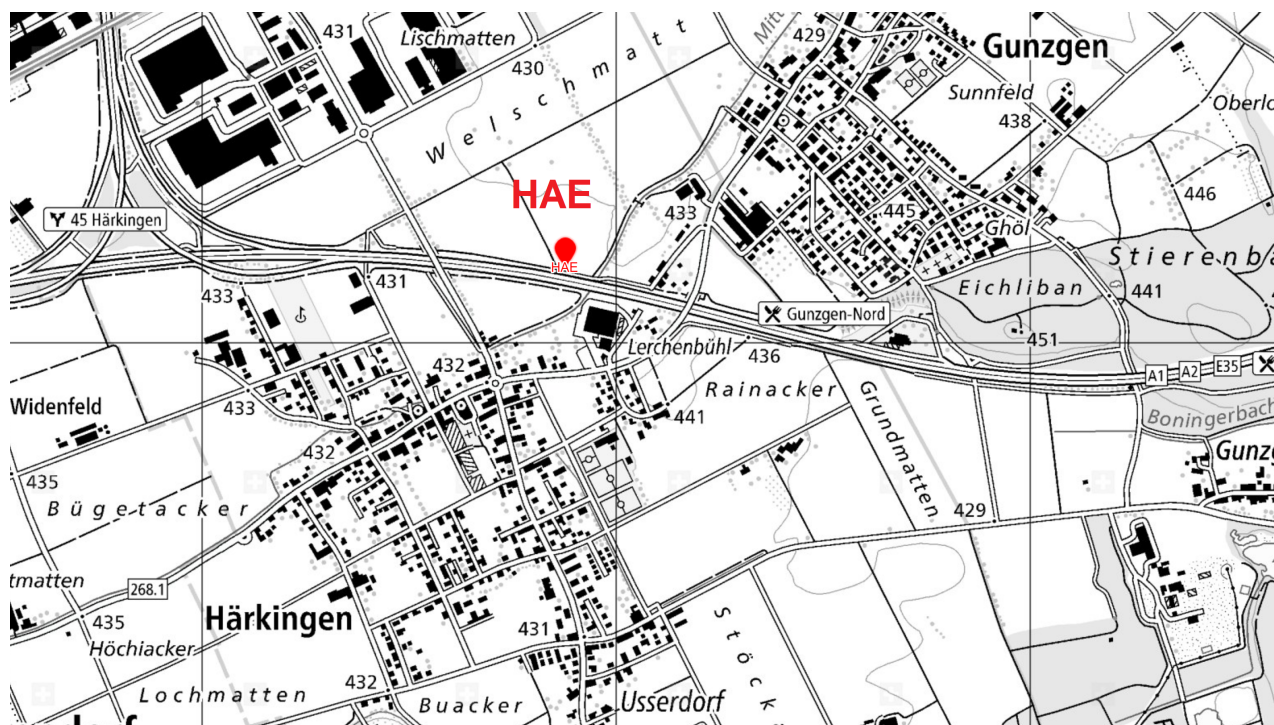

**Figure S1.** Geographical location of the reference monitoring site, Haerkingen air quality monitoring station. The map is obtained from the geo-mapping platform of the Swiss Confederation. © Swisstopo

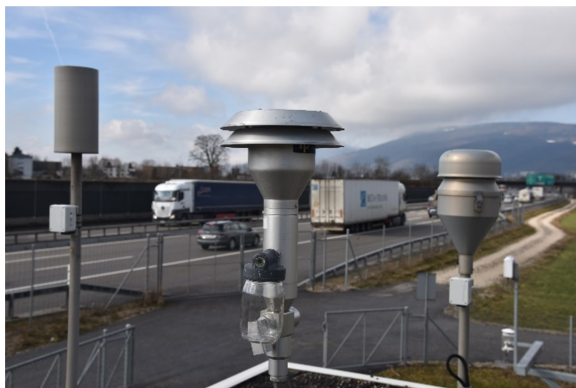

(a) View to the south-west side

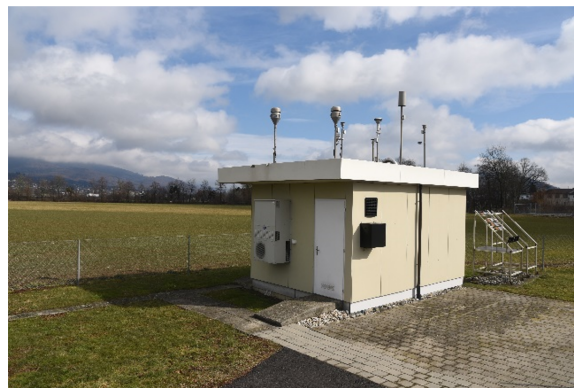

(b) View to the north-east side

**Figure S2.** Street view of Haerkingen air quality monitoring station. The images are provided by Empa.

### S-1.2 Deployment sites

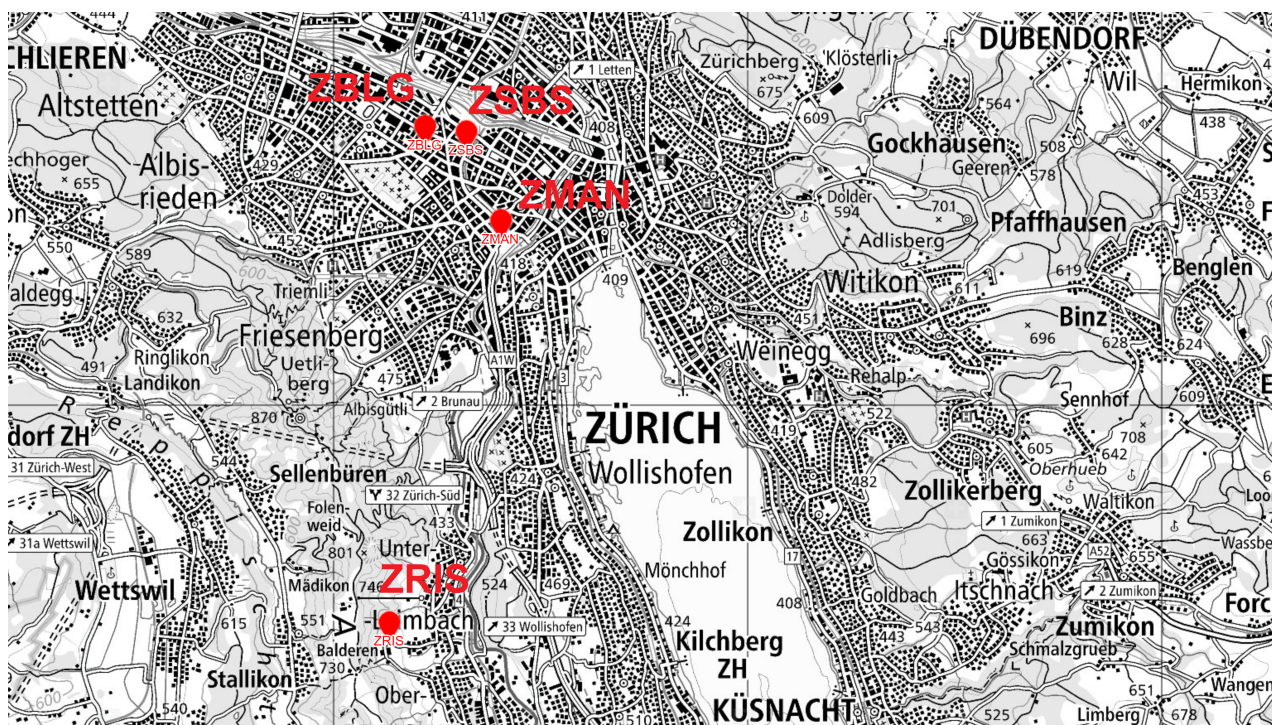

**Figure S3.** Geographical location of sensor units deployment sites in Zurich. The map is obtained from the geo-mapping platform of the Swiss Confederation. © Swisstopo

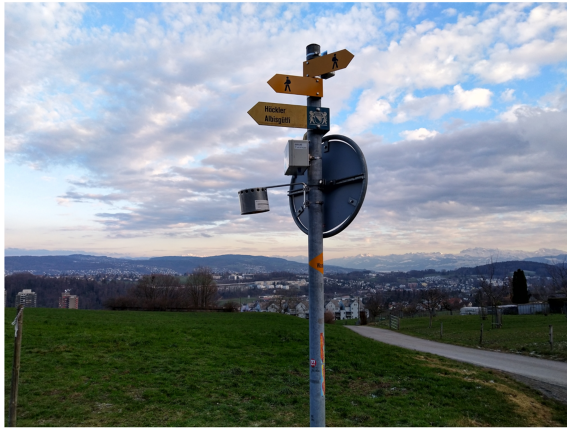

(a) ZRIS (AC009)

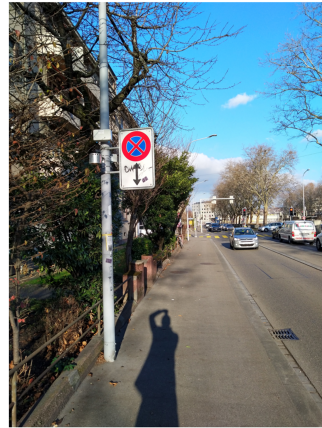

(b) ZSBS (AC011)

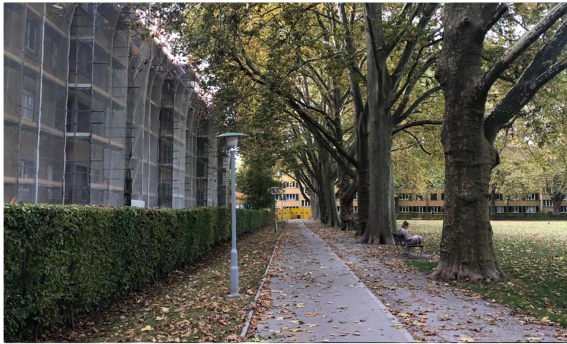

(c) ZBLG (AC010)

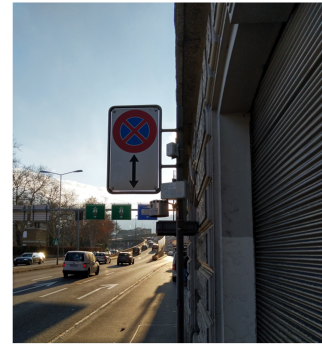

(d) ZMAN (AC012)

**Figure S4.** Street views of four sensor deployment sites in Zurich. All images of ZRIS, ZBLG, ZSBS, and ZMAN are provided by Empa.

## S-2 Calibration model selection

### 5 S-2.1 Model variables

**Table S1.** List of variables for calibration models using robust linear regression.  $V_{\text{sensor}}$  indicates the raw signals from four sensor data (two NO sensors and two  $\text{NO}_2$  sensors). T and RH parameter represents the temperature and relative humidity information respectively.  $D_{\text{RH}}$  parameter is presented in Section 2.3.

| Model number | Model variables                                                  |
|--------------|------------------------------------------------------------------|
| RLM_1        | offset( $V_{\text{sensor}}$ )                                    |
| RLM_2        | $V_{\text{sensor}}$                                              |
| RLM_3        | $V_{\text{sensor}}, T$                                           |
| RLM_4        | $V_{\text{sensor}}, RH$                                          |
| RLM_5        | $V_{\text{sensor}}, T, RH$                                       |
| RLM_6        | $V_{\text{sensor}}, T, D_{\text{RH}_60}$                         |
| RLM_7        | $V_{\text{sensor}}, T, D_{\text{RH}_90}$                         |
| RLM_8        | $V_{\text{sensor}}, T, D_{\text{RH}_120}$                        |
| RLM_9        | $V_{\text{sensor}}, T, D_{\text{RH}_150}$                        |
| RLM_10       | $V_{\text{sensor}}, RH, D_{\text{RH}_60}$                        |
| RLM_11       | $V_{\text{sensor}}, RH, D_{\text{RH}_90}$                        |
| RLM_12       | $V_{\text{sensor}}, RH, D_{\text{RH}_120}$                       |
| RLM_13       | $V_{\text{sensor}}, RH, D_{\text{RH}_150}$                       |
| RLM_14       | $V_{\text{sensor}}, T, RH, D_{\text{RH}_60}$                     |
| RLM_15       | $V_{\text{sensor}}, T, RH, D_{\text{RH}_90}$                     |
| RLM_16       | $V_{\text{sensor}}, T, RH, D_{\text{RH}_120}$                    |
| RLM_17       | $V_{\text{sensor}}, T, RH, D_{\text{RH}_150}$                    |
| RLM_18       | $V_{\text{sensor}}, T, V_{\text{sensor}} * T$                    |
| RLM_19       | $V_{\text{sensor}}, T, V_{\text{sensor}} * T, D_{\text{RH}_60}$  |
| RLM_20       | $V_{\text{sensor}}, T, V_{\text{sensor}} * T, D_{\text{RH}_90}$  |
| RLM_21       | $V_{\text{sensor}}, T, V_{\text{sensor}} * T, D_{\text{RH}_120}$ |
| RLM_22       | $V_{\text{sensor}}, T, V_{\text{sensor}} * T, D_{\text{RH}_150}$ |

**Table S2.** List of variables for calibration models using random forest regression.  $V_{\text{sensor}}$  indicates the raw signals from four sensor data (two NO sensors and two NO<sub>2</sub> sensors). T and RH parameter represents the temperature and relative humidity information respectively.  $D_{\text{RH}}$  parameter is presented in Section 2.3.

| Model number | Model variables                               |
|--------------|-----------------------------------------------|
| RF_1         | $V_{\text{sensor}}$                           |
| RF_2         | $V_{\text{sensor}}, T$                        |
| RF_3         | $V_{\text{sensor}}, T, D_{\text{RH}_60}$      |
| RF_4         | $V_{\text{sensor}}, T, D_{\text{RH}_90}$      |
| RF_5         | $V_{\text{sensor}}, T, D_{\text{RH}_120}$     |
| RF_6         | $V_{\text{sensor}}, T, D_{\text{RH}_150}$     |
| RF_7         | $V_{\text{sensor}}, \text{RH}$                |
| RF_8         | $V_{\text{sensor}}, T, \text{RH}$             |
| RF_9         | $V_{\text{sensor}}, T, V_{\text{sensor}} * T$ |

## S-2.2 Results for the statistical metrics

**Table S3.** nRMSE values of all calibration models for NO and NO<sub>2</sub> sensors during the model selection process.

| Model  | AC009 |       |                 |       | AC010 |       |                 |       | AC011 |       |                 |       | AC012 |       |                 |       |
|--------|-------|-------|-----------------|-------|-------|-------|-----------------|-------|-------|-------|-----------------|-------|-------|-------|-----------------|-------|
|        | NO    |       | NO <sub>2</sub> |       | NO    |       | NO <sub>2</sub> |       | NO    |       | NO <sub>2</sub> |       | NO    |       | NO <sub>2</sub> |       |
|        | A     | B     | A               | B     | A     | B     | A               | B     | A     | B     | A               | B     | A     | B     | A               | B     |
| RLM_1  | 0.658 | 0.673 | 0.800           | 0.785 | 0.704 | 0.737 | 0.785           | 0.765 | 0.715 | 0.694 | 0.882           | 0.785 | 0.779 | 0.729 | 0.832           | 0.784 |
| RLM_2  | 0.507 | 0.569 | 0.760           | 0.653 | 0.590 | 0.666 | 0.749           | 0.625 | 0.617 | 0.591 | 0.885           | 0.724 | 0.702 | 0.649 | 0.816           | 0.643 |
| RLM_3  | 0.463 | 0.513 | 0.686           | 0.557 | 0.507 | 0.536 | 0.668           | 0.549 | 0.499 | 0.551 | 0.847           | 0.654 | 0.432 | 0.568 | 0.747           | 0.558 |
| RLM_4  | 0.490 | 0.555 | 0.668           | 0.574 | 0.565 | 0.620 | 0.666           | 0.566 | 0.551 | 0.577 | 0.856           | 0.660 | 0.547 | 0.627 | 0.752           | 0.545 |
| RLM_5  | 0.442 | 0.475 | 0.667           | 0.556 | 0.474 | 0.498 | 0.657           | 0.548 | 0.486 | 0.530 | 0.847           | 0.650 | 0.423 | 0.517 | 0.742           | 0.542 |
| RLM_6  | 0.463 | 0.513 | 0.629           | 0.441 | 0.507 | 0.536 | 0.584           | 0.441 | 0.498 | 0.551 | 0.802           | 0.540 | 0.430 | 0.563 | 0.682           | 0.484 |
| RLM_7  | 0.463 | 0.510 | 0.608           | 0.426 | 0.505 | 0.533 | 0.556           | 0.423 | 0.499 | 0.550 | 0.784           | 0.507 | 0.431 | 0.557 | 0.663           | 0.457 |
| RLM_8  | 0.461 | 0.505 | 0.589           | 0.420 | 0.502 | 0.530 | 0.533           | 0.413 | 0.499 | 0.548 | 0.766           | 0.480 | 0.432 | 0.550 | 0.647           | 0.434 |
| RLM_9  | 0.458 | 0.500 | 0.575           | 0.420 | 0.498 | 0.526 | 0.516           | 0.409 | 0.499 | 0.545 | 0.751           | 0.462 | 0.432 | 0.543 | 0.636           | 0.415 |
| RLM_10 | 0.490 | 0.554 | 0.610           | 0.478 | 0.564 | 0.619 | 0.580           | 0.468 | 0.550 | 0.577 | 0.811           | 0.547 | 0.547 | 0.624 | 0.691           | 0.471 |
| RLM_11 | 0.490 | 0.553 | 0.596           | 0.469 | 0.563 | 0.618 | 0.561           | 0.456 | 0.551 | 0.577 | 0.797           | 0.523 | 0.547 | 0.619 | 0.679           | 0.450 |
| RLM_12 | 0.488 | 0.549 | 0.585           | 0.467 | 0.561 | 0.615 | 0.546           | 0.450 | 0.551 | 0.576 | 0.785           | 0.504 | 0.546 | 0.614 | 0.672           | 0.434 |
| RLM_13 | 0.486 | 0.546 | 0.576           | 0.468 | 0.558 | 0.612 | 0.536           | 0.448 | 0.550 | 0.574 | 0.775           | 0.491 | 0.545 | 0.608 | 0.666           | 0.422 |
| RLM_14 | 0.442 | 0.475 | 0.609           | 0.441 | 0.473 | 0.498 | 0.567           | 0.440 | 0.482 | 0.529 | 0.799           | 0.532 | 0.416 | 0.516 | 0.675           | 0.465 |
| RLM_15 | 0.442 | 0.475 | 0.594           | 0.425 | 0.474 | 0.498 | 0.544           | 0.423 | 0.484 | 0.530 | 0.782           | 0.503 | 0.418 | 0.514 | 0.659           | 0.442 |
| RLM_16 | 0.442 | 0.474 | 0.581           | 0.417 | 0.473 | 0.498 | 0.525           | 0.412 | 0.485 | 0.530 | 0.766           | 0.479 | 0.420 | 0.511 | 0.646           | 0.424 |
| RLM_17 | 0.442 | 0.472 | 0.569           | 0.414 | 0.472 | 0.497 | 0.511           | 0.407 | 0.486 | 0.529 | 0.751           | 0.462 | 0.421 | 0.508 | 0.636           | 0.409 |
| RLM_18 | 0.270 | 0.306 | 0.586           | 0.497 | 0.312 | 0.343 | 0.609           | 0.522 | 0.315 | 0.324 | 0.773           | 0.608 | 0.294 | 0.360 | 0.650           | 0.519 |
| RLM_19 | 0.268 | 0.302 | 0.507           | 0.368 | 0.307 | 0.336 | 0.503           | 0.409 | 0.314 | 0.320 | 0.666           | 0.471 | 0.293 | 0.343 | 0.519           | 0.440 |
| RLM_20 | 0.267 | 0.298 | 0.479           | 0.356 | 0.303 | 0.330 | 0.471           | 0.392 | 0.312 | 0.318 | 0.628           | 0.434 | 0.291 | 0.335 | 0.484           | 0.412 |
| RLM_21 | 0.265 | 0.294 | 0.454           | 0.354 | 0.299 | 0.325 | 0.446           | 0.384 | 0.310 | 0.314 | 0.594           | 0.406 | 0.289 | 0.328 | 0.458           | 0.388 |
| RLM_22 | 0.263 | 0.290 | 0.436           | 0.358 | 0.295 | 0.320 | 0.429           | 0.382 | 0.308 | 0.311 | 0.566           | 0.387 | 0.286 | 0.321 | 0.440           | 0.370 |
| RLM_23 | 0.268 | 0.302 | 0.507           | 0.368 | 0.307 | 0.336 | 0.503           | 0.409 | 0.314 | 0.320 | 0.666           | 0.471 | 0.293 | 0.343 | 0.519           | 0.440 |
| RLM_24 | 0.267 | 0.298 | 0.479           | 0.356 | 0.303 | 0.330 | 0.471           | 0.392 | 0.312 | 0.318 | 0.628           | 0.434 | 0.291 | 0.335 | 0.484           | 0.412 |
| RLM_25 | 0.265 | 0.294 | 0.454           | 0.354 | 0.299 | 0.325 | 0.446           | 0.384 | 0.310 | 0.314 | 0.594           | 0.406 | 0.289 | 0.328 | 0.458           | 0.388 |
| RLM_26 | 0.263 | 0.290 | 0.436           | 0.358 | 0.295 | 0.320 | 0.429           | 0.382 | 0.308 | 0.311 | 0.566           | 0.387 | 0.286 | 0.321 | 0.440           | 0.370 |
| RF_1   | 0.425 | 0.490 | 0.626           | 0.566 | 0.532 | 0.616 | 0.663           | 0.562 | 0.561 | 0.500 | 0.784           | 0.645 | 0.664 | 0.569 | 0.687           | 0.580 |
| RF_2   | 0.228 | 0.254 | 0.519           | 0.472 | 0.259 | 0.277 | 0.557           | 0.469 | 0.255 | 0.267 | 0.726           | 0.569 | 0.242 | 0.296 | 0.596           | 0.461 |
| RF_3   | 0.236 | 0.257 | 0.372           | 0.297 | 0.260 | 0.274 | 0.405           | 0.311 | 0.252 | 0.261 | 0.584           | 0.368 | 0.247 | 0.283 | 0.400           | 0.329 |
| RF_4   | 0.232 | 0.253 | 0.349           | 0.292 | 0.257 | 0.270 | 0.383           | 0.300 | 0.252 | 0.261 | 0.551           | 0.344 | 0.244 | 0.278 | 0.375           | 0.312 |
| RF_5   | 0.231 | 0.252 | 0.335           | 0.294 | 0.257 | 0.269 | 0.365           | 0.295 | 0.253 | 0.260 | 0.521           | 0.331 | 0.243 | 0.274 | 0.363           | 0.302 |
| RF_6   | 0.229 | 0.250 | 0.326           | 0.299 | 0.257 | 0.268 | 0.354           | 0.295 | 0.251 | 0.258 | 0.503           | 0.322 | 0.241 | 0.273 | 0.354           | 0.295 |
| RF_7   | 0.314 | 0.363 | 0.521           | 0.492 | 0.426 | 0.476 | 0.581           | 0.503 | 0.380 | 0.388 | 0.735           | 0.589 | 0.395 | 0.454 | 0.623           | 0.479 |
| RF_8   | 0.229 | 0.248 | 0.486           | 0.461 | 0.247 | 0.259 | 0.532           | 0.458 | 0.248 | 0.257 | 0.688           | 0.548 | 0.242 | 0.278 | 0.565           | 0.441 |
| RF_9   | 0.229 | 0.254 | 0.519           | 0.472 | 0.259 | 0.277 | 0.557           | 0.469 | 0.255 | 0.267 | 0.726           | 0.568 | 0.241 | 0.295 | 0.596           | 0.461 |

**Table S4.**  $R^2$  values of all calibration models for NO and NO<sub>2</sub> sensors during the model selection process.

| Model  | AC009 |       |                 |       | AC010 |       |                 |       | AC011 |       |                 |       | AC012 |       |                 |       |
|--------|-------|-------|-----------------|-------|-------|-------|-----------------|-------|-------|-------|-----------------|-------|-------|-------|-----------------|-------|
|        | NO    |       | NO <sub>2</sub> |       | NO    |       | NO <sub>2</sub> |       | NO    |       | NO <sub>2</sub> |       | NO    |       | NO <sub>2</sub> |       |
|        | A     | B     | A               | B     | A     | B     | A               | B     | A     | B     | A               | B     | A     | B     | A               | B     |
| RLM_1  | 0.744 | 0.677 | 0.435           | 0.587 | 0.652 | 0.559 | 0.448           | 0.615 | 0.620 | 0.651 | 0.227           | 0.483 | 0.509 | 0.582 | 0.341           | 0.590 |
| RLM_2  | 0.744 | 0.677 | 0.435           | 0.587 | 0.652 | 0.559 | 0.448           | 0.615 | 0.620 | 0.651 | 0.227           | 0.483 | 0.509 | 0.582 | 0.341           | 0.590 |
| RLM_3  | 0.793 | 0.738 | 0.532           | 0.691 | 0.749 | 0.716 | 0.555           | 0.699 | 0.764 | 0.706 | 0.287           | 0.574 | 0.814 | 0.679 | 0.443           | 0.688 |
| RLM_4  | 0.761 | 0.693 | 0.558           | 0.673 | 0.681 | 0.618 | 0.558           | 0.681 | 0.698 | 0.668 | 0.273           | 0.565 | 0.701 | 0.609 | 0.437           | 0.703 |
| RLM_5  | 0.810 | 0.777 | 0.559           | 0.693 | 0.783 | 0.756 | 0.570           | 0.700 | 0.778 | 0.732 | 0.288           | 0.578 | 0.823 | 0.735 | 0.451           | 0.707 |
| RLM_6  | 0.793 | 0.739 | 0.608           | 0.808 | 0.749 | 0.716 | 0.661           | 0.807 | 0.765 | 0.706 | 0.365           | 0.710 | 0.817 | 0.685 | 0.543           | 0.766 |
| RLM_7  | 0.793 | 0.742 | 0.635           | 0.821 | 0.751 | 0.719 | 0.693           | 0.822 | 0.764 | 0.707 | 0.396           | 0.745 | 0.815 | 0.691 | 0.571           | 0.792 |
| RLM_8  | 0.795 | 0.746 | 0.658           | 0.826 | 0.754 | 0.722 | 0.719           | 0.830 | 0.764 | 0.710 | 0.425           | 0.771 | 0.815 | 0.699 | 0.595           | 0.813 |
| RLM_9  | 0.797 | 0.751 | 0.677           | 0.826 | 0.758 | 0.726 | 0.737           | 0.833 | 0.764 | 0.713 | 0.450           | 0.789 | 0.814 | 0.707 | 0.613           | 0.828 |
| RLM_10 | 0.761 | 0.694 | 0.635           | 0.776 | 0.682 | 0.619 | 0.667           | 0.783 | 0.699 | 0.668 | 0.354           | 0.703 | 0.701 | 0.613 | 0.538           | 0.779 |
| RLM_11 | 0.761 | 0.696 | 0.654           | 0.784 | 0.683 | 0.621 | 0.691           | 0.794 | 0.698 | 0.668 | 0.380           | 0.730 | 0.701 | 0.619 | 0.558           | 0.798 |
| RLM_12 | 0.762 | 0.699 | 0.670           | 0.786 | 0.685 | 0.624 | 0.708           | 0.799 | 0.698 | 0.669 | 0.403           | 0.749 | 0.702 | 0.626 | 0.573           | 0.813 |
| RLM_13 | 0.764 | 0.703 | 0.681           | 0.785 | 0.688 | 0.628 | 0.719           | 0.800 | 0.699 | 0.672 | 0.423           | 0.762 | 0.703 | 0.632 | 0.584           | 0.823 |
| RLM_14 | 0.811 | 0.777 | 0.636           | 0.808 | 0.783 | 0.756 | 0.681           | 0.807 | 0.781 | 0.734 | 0.371           | 0.718 | 0.828 | 0.736 | 0.556           | 0.784 |
| RLM_15 | 0.811 | 0.777 | 0.656           | 0.822 | 0.783 | 0.756 | 0.708           | 0.822 | 0.779 | 0.733 | 0.400           | 0.749 | 0.826 | 0.738 | 0.580           | 0.805 |
| RLM_16 | 0.810 | 0.778 | 0.673           | 0.829 | 0.783 | 0.756 | 0.728           | 0.831 | 0.778 | 0.733 | 0.428           | 0.772 | 0.825 | 0.741 | 0.600           | 0.821 |
| RLM_17 | 0.811 | 0.780 | 0.686           | 0.830 | 0.784 | 0.757 | 0.742           | 0.835 | 0.778 | 0.733 | 0.451           | 0.789 | 0.824 | 0.744 | 0.615           | 0.834 |
| RLM_18 | 0.927 | 0.906 | 0.658           | 0.754 | 0.902 | 0.882 | 0.632           | 0.729 | 0.901 | 0.896 | 0.407           | 0.632 | 0.914 | 0.871 | 0.580           | 0.732 |
| RLM_19 | 0.928 | 0.909 | 0.745           | 0.864 | 0.906 | 0.887 | 0.749           | 0.833 | 0.902 | 0.898 | 0.560           | 0.779 | 0.914 | 0.882 | 0.733           | 0.807 |
| RLM_20 | 0.929 | 0.911 | 0.772           | 0.873 | 0.908 | 0.891 | 0.780           | 0.847 | 0.903 | 0.900 | 0.609           | 0.813 | 0.915 | 0.888 | 0.768           | 0.831 |
| RLM_21 | 0.930 | 0.914 | 0.795           | 0.875 | 0.911 | 0.894 | 0.802           | 0.853 | 0.904 | 0.902 | 0.650           | 0.836 | 0.917 | 0.893 | 0.793           | 0.850 |
| RLM_22 | 0.931 | 0.916 | 0.811           | 0.872 | 0.913 | 0.898 | 0.817           | 0.854 | 0.906 | 0.903 | 0.682           | 0.850 | 0.918 | 0.897 | 0.808           | 0.864 |
| RLM_23 | 0.928 | 0.909 | 0.745           | 0.864 | 0.906 | 0.887 | 0.749           | 0.833 | 0.902 | 0.898 | 0.560           | 0.779 | 0.914 | 0.882 | 0.733           | 0.807 |
| RLM_24 | 0.929 | 0.911 | 0.772           | 0.873 | 0.908 | 0.891 | 0.780           | 0.847 | 0.903 | 0.900 | 0.609           | 0.813 | 0.915 | 0.888 | 0.768           | 0.831 |
| RLM_25 | 0.930 | 0.914 | 0.795           | 0.875 | 0.911 | 0.894 | 0.802           | 0.853 | 0.904 | 0.902 | 0.650           | 0.836 | 0.917 | 0.893 | 0.793           | 0.850 |
| RLM_26 | 0.931 | 0.916 | 0.811           | 0.872 | 0.913 | 0.898 | 0.817           | 0.854 | 0.906 | 0.903 | 0.682           | 0.850 | 0.918 | 0.897 | 0.808           | 0.864 |
| RF_1   | 0.820 | 0.760 | 0.608           | 0.680 | 0.717 | 0.622 | 0.561           | 0.685 | 0.686 | 0.750 | 0.387           | 0.585 | 0.559 | 0.677 | 0.529           | 0.663 |
| RF_2   | 0.948 | 0.936 | 0.731           | 0.777 | 0.933 | 0.923 | 0.690           | 0.780 | 0.935 | 0.929 | 0.473           | 0.677 | 0.942 | 0.913 | 0.645           | 0.788 |
| RF_3   | 0.949 | 0.939 | 0.867           | 0.917 | 0.934 | 0.928 | 0.843           | 0.909 | 0.939 | 0.934 | 0.666           | 0.872 | 0.944 | 0.924 | 0.849           | 0.898 |
| RF_4   | 0.951 | 0.941 | 0.885           | 0.922 | 0.936 | 0.930 | 0.861           | 0.916 | 0.938 | 0.934 | 0.704           | 0.889 | 0.945 | 0.927 | 0.869           | 0.910 |
| RF_5   | 0.950 | 0.941 | 0.896           | 0.920 | 0.936 | 0.930 | 0.875           | 0.919 | 0.938 | 0.934 | 0.737           | 0.898 | 0.946 | 0.929 | 0.879           | 0.916 |
| RF_6   | 0.952 | 0.942 | 0.902           | 0.917 | 0.936 | 0.930 | 0.883           | 0.919 | 0.939 | 0.935 | 0.756           | 0.904 | 0.946 | 0.929 | 0.885           | 0.920 |
| RF_7   | 0.902 | 0.868 | 0.728           | 0.758 | 0.819 | 0.773 | 0.662           | 0.747 | 0.856 | 0.850 | 0.460           | 0.653 | 0.844 | 0.794 | 0.612           | 0.771 |
| RF_8   | 0.952 | 0.944 | 0.767           | 0.789 | 0.942 | 0.936 | 0.720           | 0.792 | 0.940 | 0.936 | 0.529           | 0.702 | 0.945 | 0.927 | 0.686           | 0.810 |
| RF_9   | 0.948 | 0.937 | 0.731           | 0.777 | 0.933 | 0.923 | 0.690           | 0.780 | 0.935 | 0.929 | 0.473           | 0.677 | 0.942 | 0.913 | 0.645           | 0.788 |

### S-3 Sensor performance

#### S-3.1 Calibration evaluation

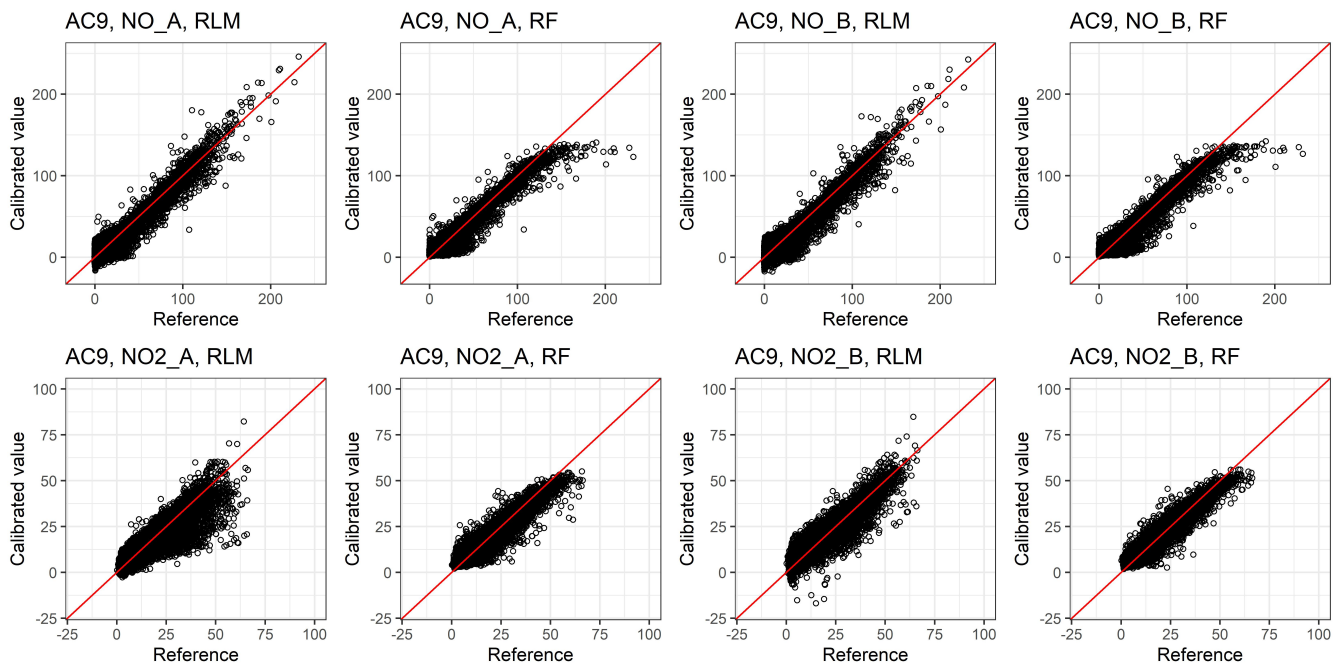

**Figure S5.** Calibrated and Reference concentrations in AC009 during the first co-location campaign. Red line in the plot indicates 1:1 identity line.



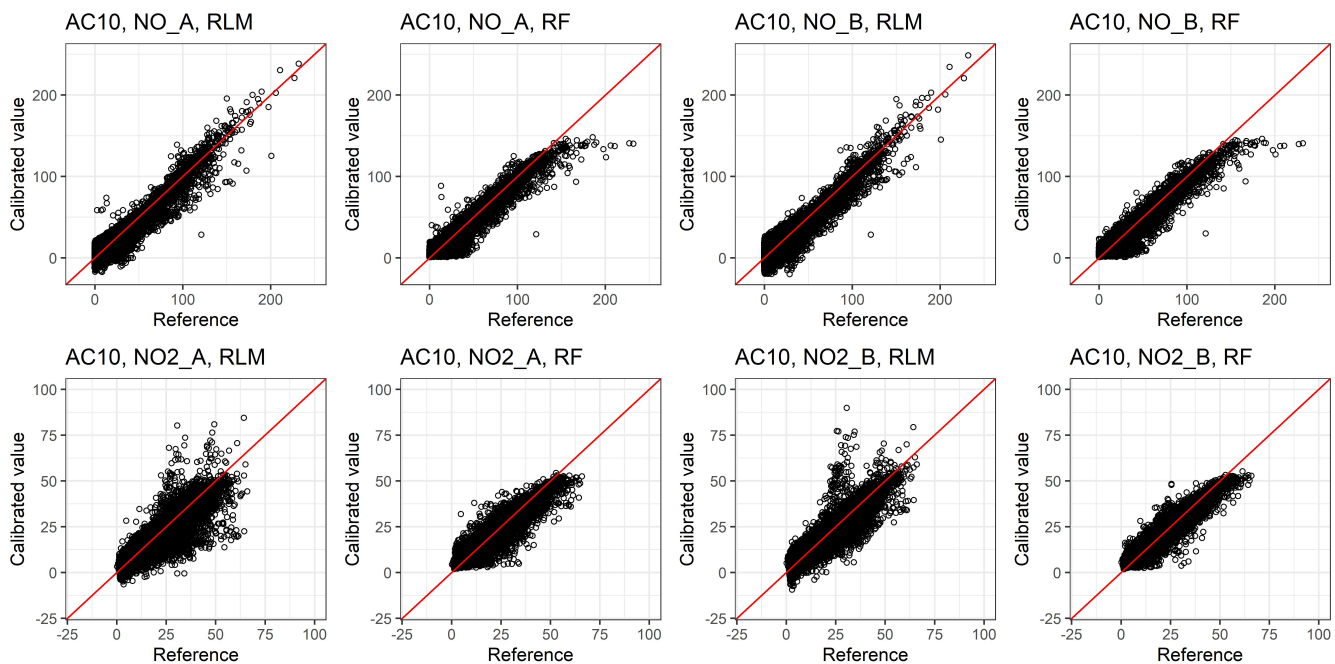

**Figure S6.** Calibrated and Reference concentrations in AC010 during the first co-location campaign. Red line in the plot indicates 1:1 identity line.

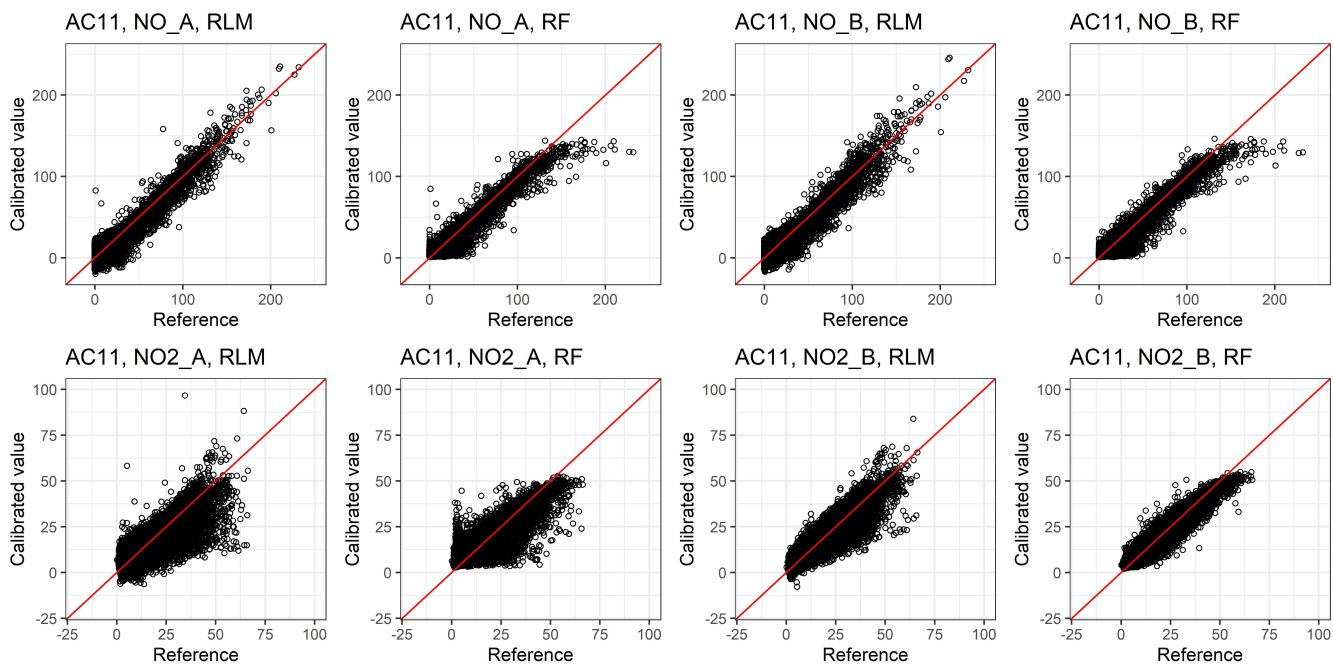

**Figure S7.** Calibrated and Reference concentrations in AC011 during the first co-location campaign. Red line in the plot indicates 1:1 identity line.

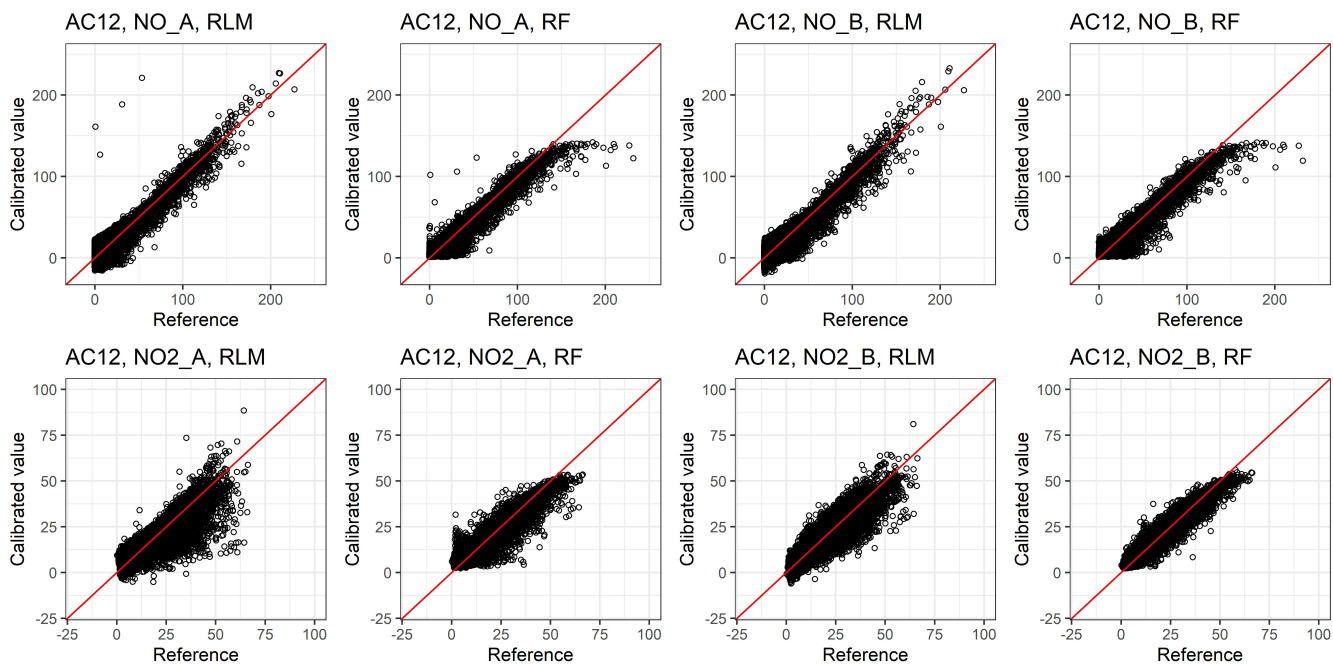

**Figure S8.** Calibrated and Reference concentrations in AC012 during the first co-location campaign. Red line in the plot indicates 1:1 identity line.

**Table S5.** Statistical metrics for all NO and NO<sub>2</sub> sensors during during the first and second co-location campaigns.

|       |        | RMSE [ppb] |       |      |      | MBE [ppb] |       |       |       | $R^2$ [-] |      |      |      | nRMSE [-] |      |      |      |
|-------|--------|------------|-------|------|------|-----------|-------|-------|-------|-----------|------|------|------|-----------|------|------|------|
|       |        | RLM        |       | RF   |      | RLM       |       | RF    |       | RLM       |      | RF   |      | RLM       |      | RF   |      |
| Unit  | Sensor | 1st        | 2nd   | 1st  | 2nd  | 1st       | 2nd   | 1st   | 2nd   | 1st       | 2nd  | 1st  | 2nd  | 1st       | 2nd  | 1st  | 2nd  |
| AC009 | NO_00  | 7.43       | 6.57  | 6.52 | 5.70 | -0.20     | -2.04 | -0.03 | -0.32 | 0.93      | 0.96 | 0.95 | 0.96 | 0.27      | 0.25 | 0.24 | 0.22 |
|       | NO_01  | 8.13       | 7.28  | 7.05 | 6.49 | -0.24     | -1.01 | -0.03 | 0.74  | 0.91      | 0.95 | 0.94 | 0.94 | 0.29      | 0.28 | 0.26 | 0.25 |
|       | NO2_00 | 4.89       | 5.70  | 3.03 | 5.29 | -0.51     | 1.89  | -0.02 | 2.32  | 0.81      | 0.75 | 0.93 | 0.80 | 0.44      | 0.55 | 0.27 | 0.51 |
|       | NO2_01 | 3.96       | 7.07  | 2.83 | 6.62 | 0.00      | 2.86  | -0.02 | 2.88  | 0.87      | 0.63 | 0.94 | 0.68 | 0.35      | 0.68 | 0.25 | 0.63 |
| AC010 | NO_00  | 7.65       | 10.14 | 6.67 | 8.40 | -0.30     | -7.66 | -0.03 | -2.85 | 0.92      | 0.96 | 0.94 | 0.92 | 0.29      | 0.39 | 0.25 | 0.32 |
|       | NO_01  | 8.32       | 7.28  | 7.05 | 6.79 | -0.23     | -0.72 | -0.03 | 0.29  | 0.90      | 0.95 | 0.93 | 0.93 | 0.31      | 0.28 | 0.27 | 0.26 |
|       | NO2_00 | 4.95       | 6.73  | 3.45 | 6.33 | -0.34     | 3.07  | -0.02 | 3.19  | 0.81      | 0.66 | 0.91 | 0.74 | 0.44      | 0.66 | 0.30 | 0.62 |
|       | NO2_01 | 4.40       | 6.38  | 2.90 | 5.85 | -0.07     | 1.77  | -0.01 | 2.50  | 0.85      | 0.64 | 0.94 | 0.77 | 0.39      | 0.62 | 0.26 | 0.57 |
| AC011 | NO_00  | 7.77       | 7.28  | 6.63 | 5.81 | -0.21     | 1.10  | -0.03 | 1.61  | 0.91      | 0.96 | 0.94 | 0.95 | 0.29      | 0.28 | 0.25 | 0.22 |
|       | NO_01  | 7.94       | 7.97  | 6.84 | 6.34 | -0.22     | 1.00  | -0.03 | 1.44  | 0.91      | 0.95 | 0.94 | 0.94 | 0.30      | 0.30 | 0.26 | 0.24 |
|       | NO2_00 | 6.41       | 8.44  | 5.21 | 7.91 | -0.60     | 3.52  | -0.01 | 3.69  | 0.69      | 0.50 | 0.79 | 0.55 | 0.56      | 0.81 | 0.46 | 0.76 |
|       | NO2_01 | 4.35       | 7.33  | 3.03 | 6.96 | -0.21     | 2.98  | -0.02 | 2.84  | 0.85      | 0.60 | 0.93 | 0.63 | 0.38      | 0.71 | 0.27 | 0.67 |
| AC012 | NO_00  | 7.79       | 6.64  | 6.64 | 5.95 | -0.20     | 1.28  | -0.03 | 1.85  | 0.92      | 0.96 | 0.94 | 0.95 | 0.29      | 0.26 | 0.25 | 0.23 |
|       | NO_01  | 8.30       | 7.72  | 7.27 | 6.28 | -0.21     | -0.41 | -0.03 | 1.30  | 0.90      | 0.95 | 0.93 | 0.94 | 0.31      | 0.30 | 0.27 | 0.25 |
|       | NO2_00 | 5.08       | 6.70  | 3.44 | 5.36 | -0.52     | -1.35 | -0.03 | -0.18 | 0.80      | 0.66 | 0.91 | 0.73 | 0.44      | 0.65 | 0.30 | 0.52 |
|       | NO2_01 | 4.26       | 5.90  | 2.85 | 5.03 | -0.20     | 1.02  | -0.02 | 1.45  | 0.86      | 0.71 | 0.94 | 0.78 | 0.37      | 0.58 | 0.25 | 0.49 |

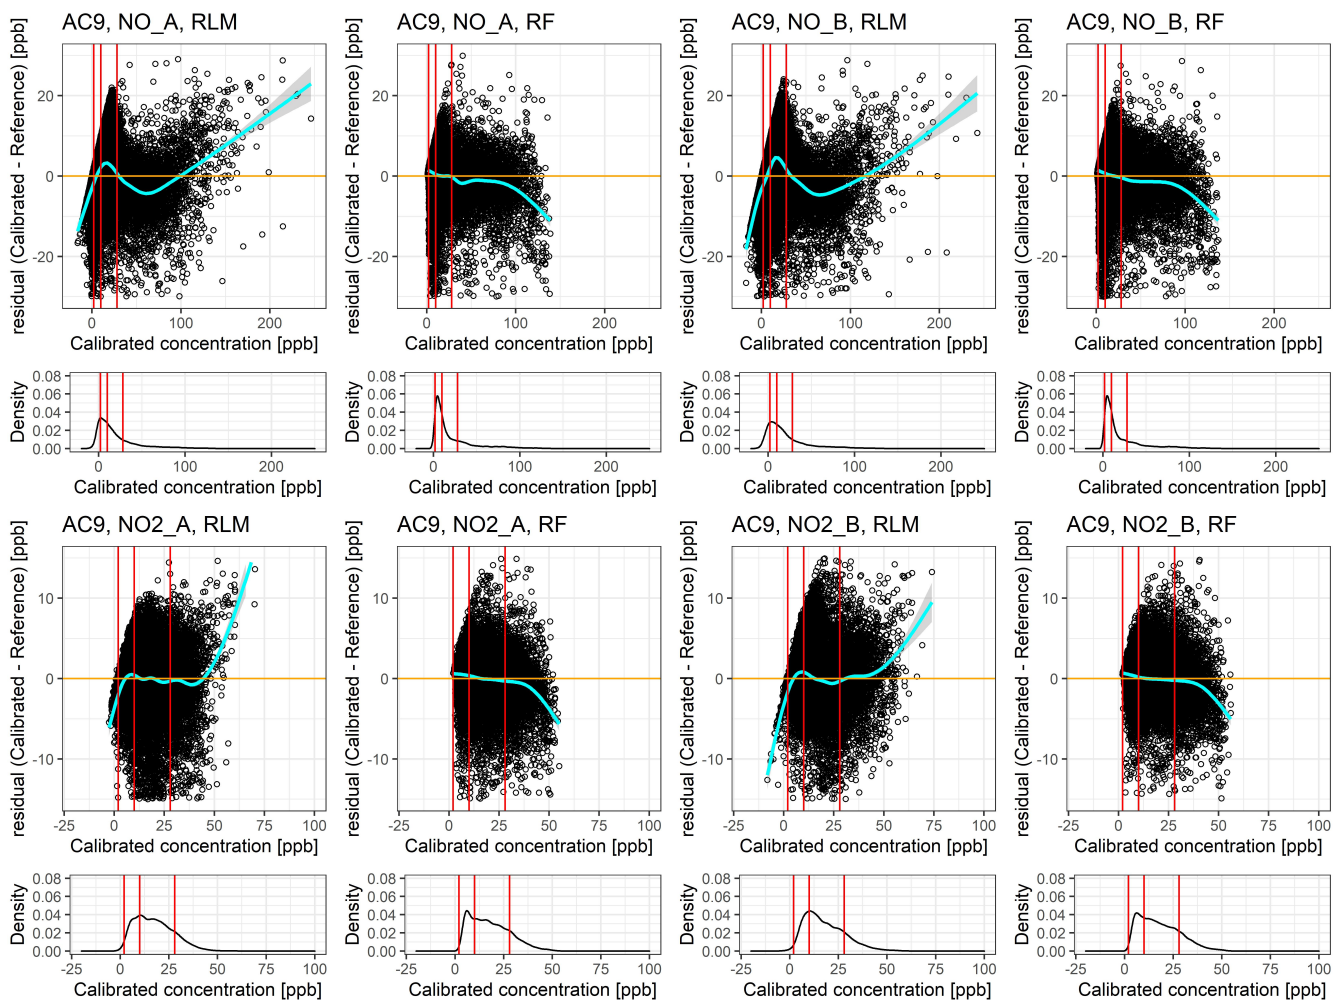

**Figure S9.** Residual plots for the predicted concentrations of AC009 at the first co-location campaign. A distribution density of predicted concentration was illustrated below each residual plots. Vertical red lines in the plots indicate 25%, 50%, and 75% quantile of the reference concentration. A horizontal orange line indicates x-axis (0 ppb of residual). Moreover, smoothed means of residual at each calibrated values are presented as cyan-colored curves.

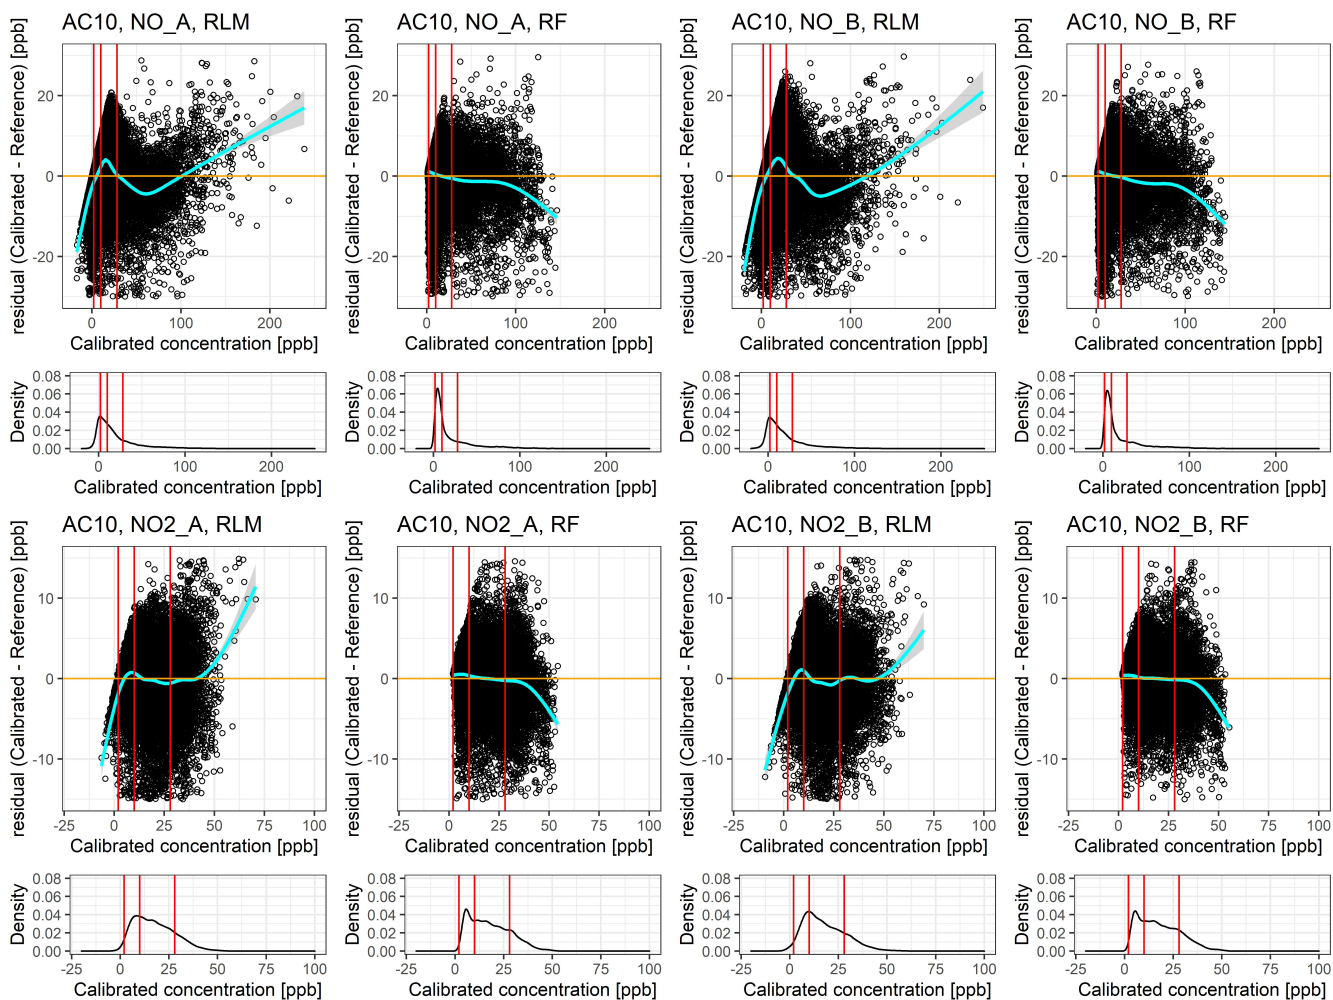

**Figure S10.** Residual plots for the predicted concentrations of AC10 at the first co-location campaign. A distribution density of predicted concentration was illustrated below each residual plots. Vertical red lines in the plots indicate 25%, 50%, and 75% quantile of the reference concentration. A horizontal orange line indicates x-axis (0 ppb of residual). Moreover, smoothed means of residual at each calibrated values are presented as cyan-colored curves.

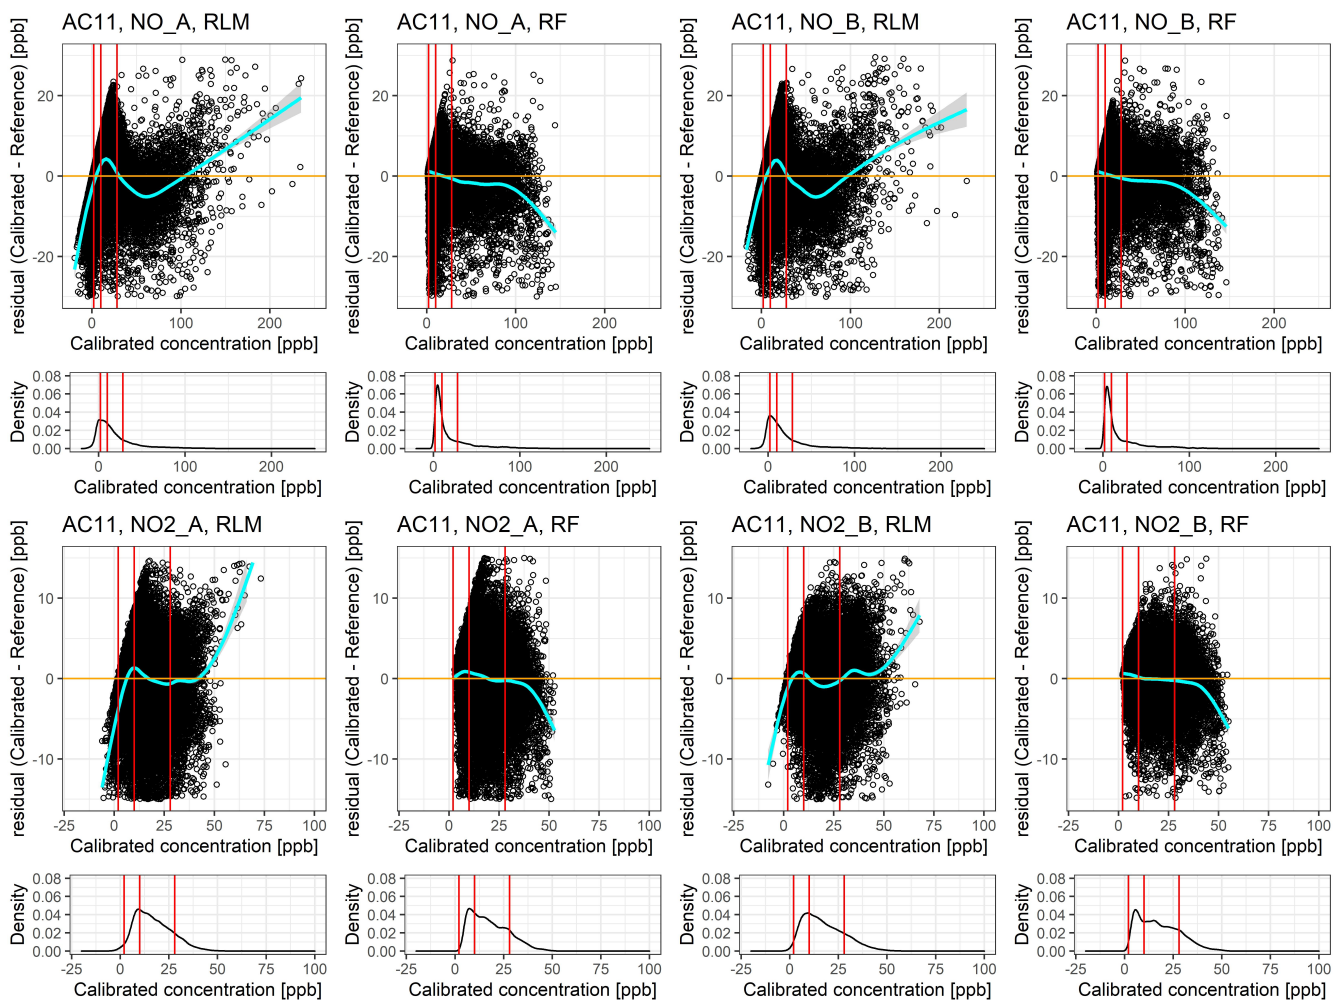

**Figure S11.** Residual plots for the predicted concentrations of AC011 at the first co-location campaign. A distribution density of predicted concentration was illustrated below each residual plots. Vertical red lines in the plots indicate 25%, 50%, and 75% quantile of the reference concentration. A horizontal orange line indicates x-axis (0 ppb of residual). Moreover, smoothed means of residual at each calibrated values are presented as cyan-colored curves.

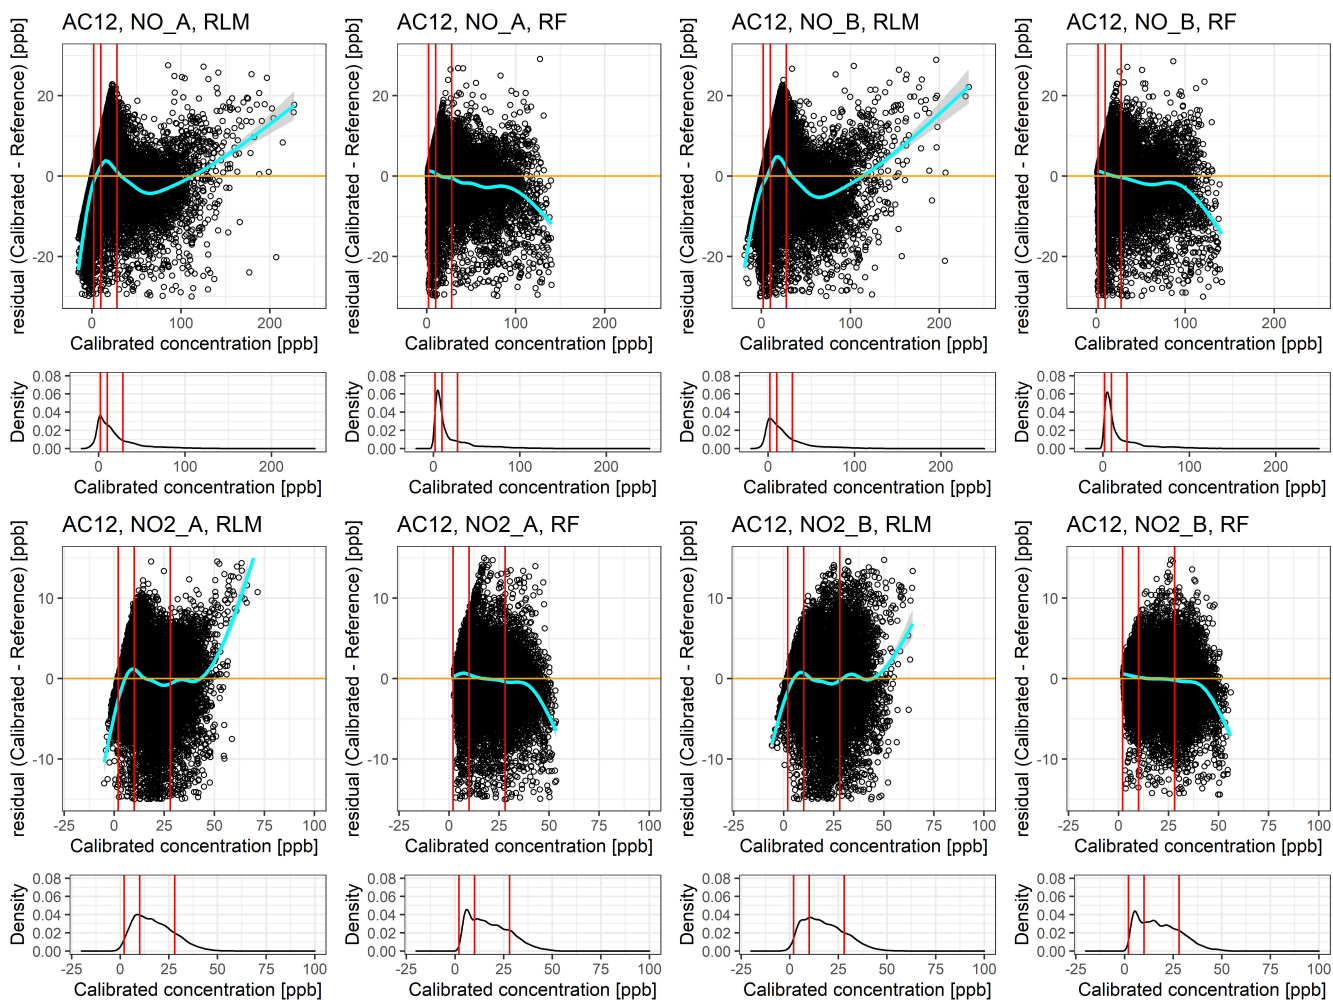

**Figure S12.** Residual plots for the predicted concentrations of AC012 at the first co-location campaign. A distribution density of predicted concentration was illustrated below each residual plots. Vertical red lines in the plots indicate 25%, 50%, and 75% quantile of the reference concentration. A horizontal orange line indicates x-axis (0 ppb of residual). Moreover, smoothed means of residual at each calibrated values are presented as cyan-colored curves.





### S-3.2 Deployment periods

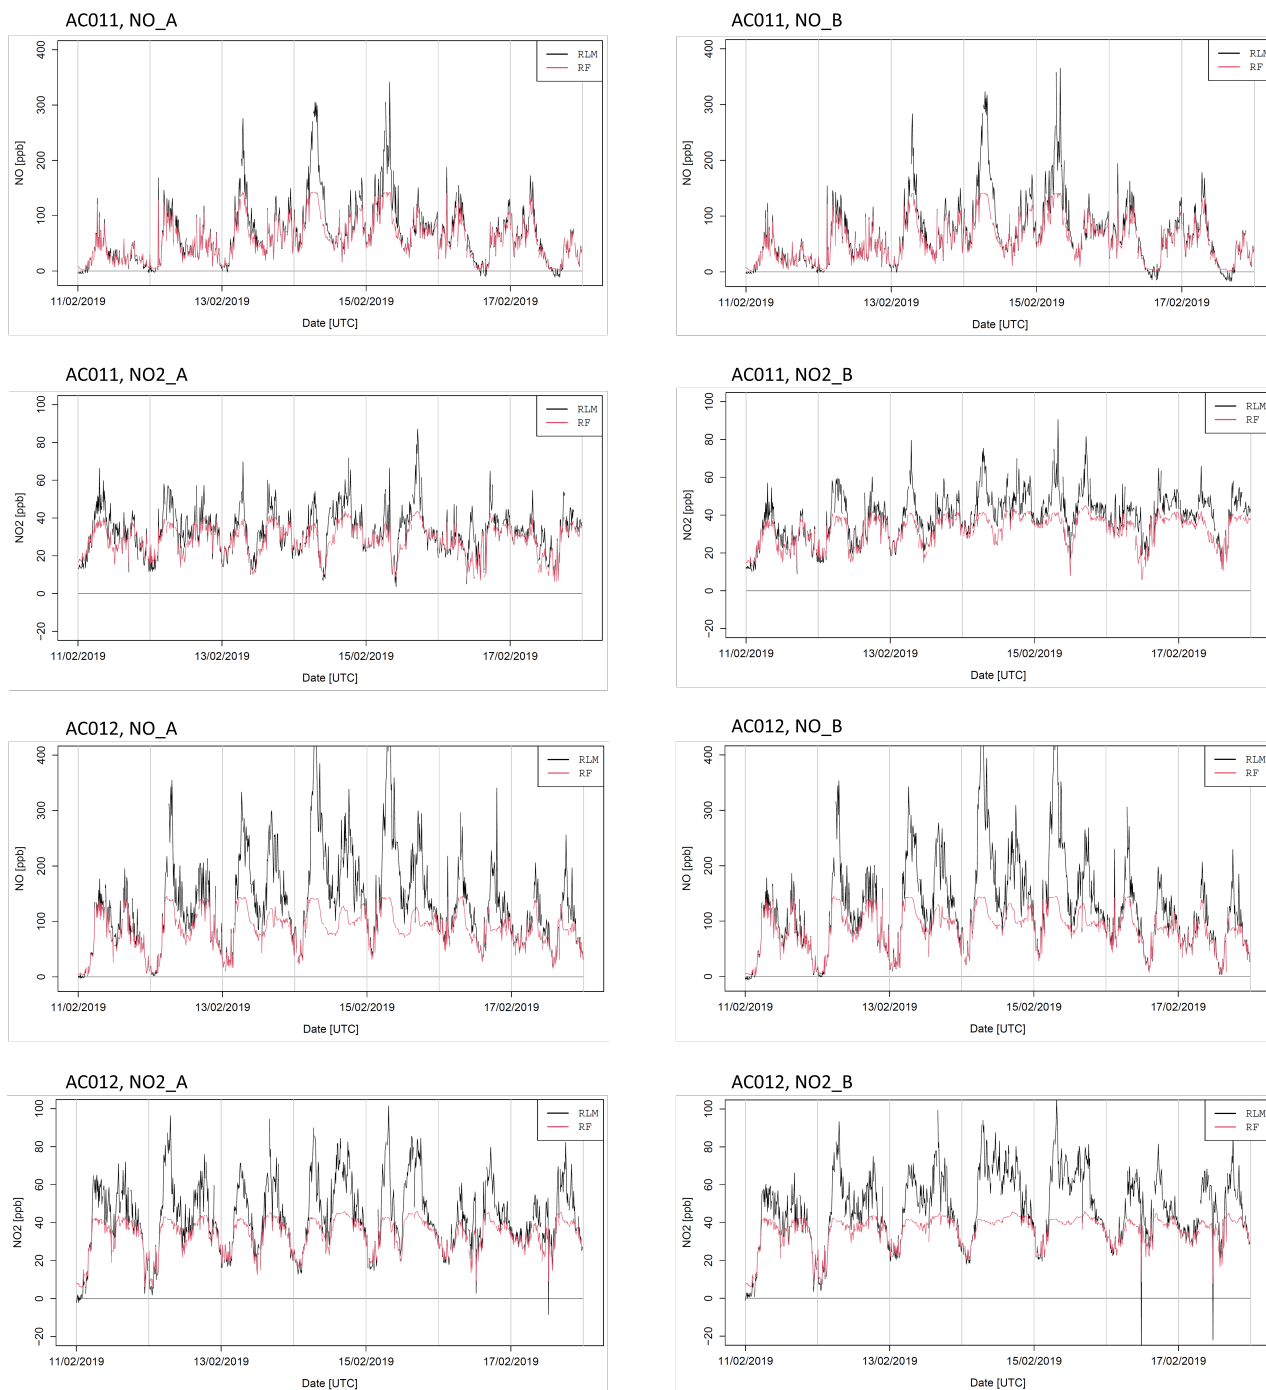

**Figure S13.** Examples of the time-series of AC011 and AC012 during the deployment period. The time-series visualize the upper limitation of the prediction by the random forest regression.

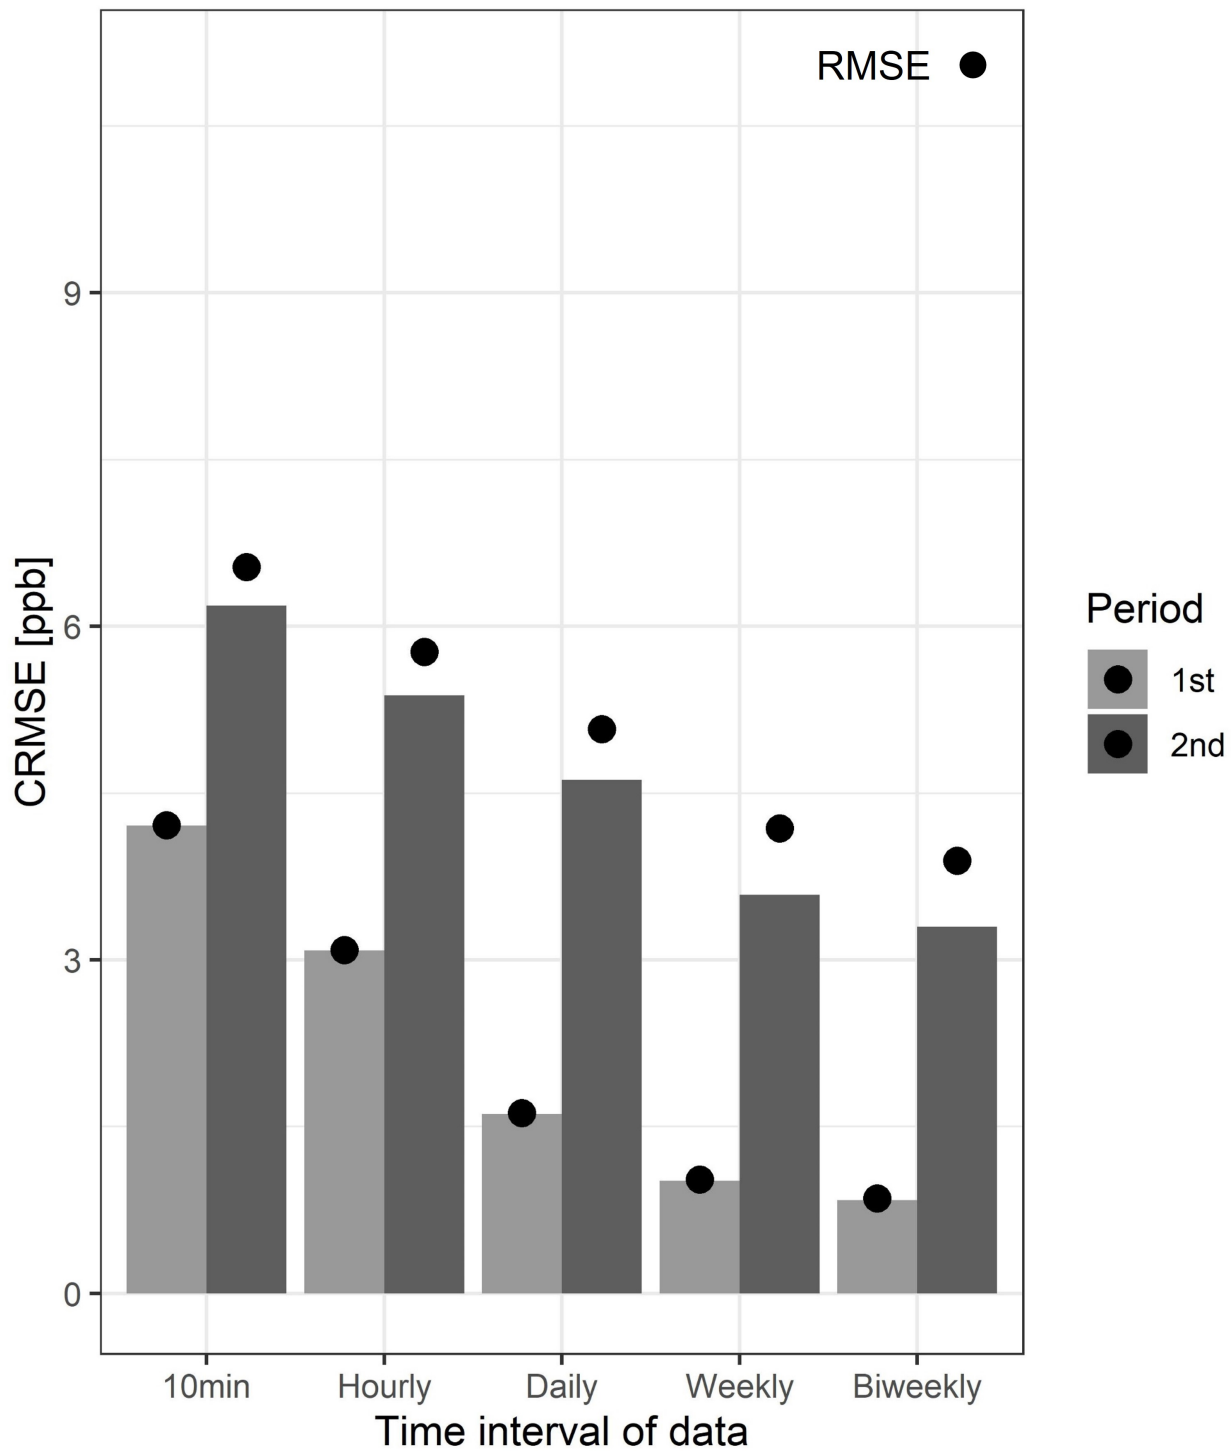

**Figure S14.** Statistical metrics of NO<sub>2</sub> sensors depending on the time interval. Figure demonstrates that RMSE and CRMSE values in two periods of co-location site decreases as the time interval increases from 10-minutes to bi-weekly resolution.

## 10 S-3.3 Assessment of sensor performance after deployment

### S-3.3.1 Data filtering

To identify malfunctioning sensors, following steps were implemented in all sensor units: For the first step, the malfunctioning period was pre-selected from the NO\_A sensor of each unit. Two time-series were mainly observed for the detection. (1) I detected the malfunction period from the time-series contained sensor raw-signal data ( $S_{raw}$ ) and reference concentration  
15 ( $S_{ref}$ ). (2) With the time-series of  $|\Delta S_{raw}|$  and  $|\Delta S_{ref}|$ , I checked again the discrepancy between the dynamics of two data. For the second step, I checked whether the pre-selection periods from the NO\_A sensor were in accordance with those from NO\_B, NO2\_A, NO2\_B sensors. As a result, only the periods detected concurrently in all four sensors were filtered. This is because the malfunctioning was possibly caused by the external environmental factors outside of the sensor unit and would affect simultaneously to every sensors.

| Sensor           | Start            | End              |
|------------------|------------------|------------------|
| AC009            | 2020-01-28 8:00  | 2020-01-28 14:00 |
|                  | 2020-02-04 3:00  | 2020-02-05 4:00  |
|                  | 2020-02-10 4:00  | 2020-02-10 11:00 |
|                  | 2020-02-13 17:00 | 2020-02-14 13:00 |
|                  | 2020-03-10 14:00 | 2020-03-11 12:00 |
| AC010            | 2020-01-28 8:00  | 2020-01-28 14:00 |
|                  | 2020-02-04 2:00  | 2020-02-04 13:00 |
|                  | 2020-02-10 4:00  | 2020-02-10 13:00 |
|                  | 2020-02-11 4:00  | 2020-02-11 13:00 |
|                  | 2020-02-13 17:00 | 2020-02-14 11:00 |
|                  | 2020-02-18 00:00 | 2020-02-18 13:00 |
|                  | 2020-02-19 9:00  | 2020-02-19 19:00 |
|                  | 2020-02-25 14:00 | 2020-02-27 21:00 |
|                  | 2020-02-29 17:00 | 2020-03-03 11:00 |
|                  | 2020-03-06 4:00  | 2020-03-06 11:00 |
|                  | 2020-03-10 9:00  | 2020-03-11 12:00 |
| AC011            | 2019-12-22 17:00 | 2019-12-23 16:00 |
|                  | 2020-01-28 8:00  | 2020-01-28 13:00 |
|                  | 2020-02-04 3:00  | 2020-02-04 19:00 |
|                  | 2020-02-11 4:00  | 2020-02-11 13:00 |
|                  | 2020-02-13 17:00 | 2020-02-14 8:00  |
|                  | 2020-02-26 3:00  | 2020-02-26 10:00 |
|                  | 2020-02-29 16:00 | 2020-03-01 12:00 |
|                  | 2020-03-01 18:00 | 2020-03-02 17:00 |
| 2020-03-10 11:00 | 2020-03-11 14:00 |                  |
| AC012            | 2020-01-28 8:00  | 2020-01-28 13:00 |
|                  | 2020-02-13 17:00 | 2020-02-14 14:00 |
|                  | 2020-03-10 13:00 | 2020-03-11 12:00 |

**Table S6.** Data filtering periods. The data obtained in the periods shown in the table are filtered for the performance analysis in the co-location period after deployment (second co-location campaign). The filtering method is based on the sensor malfunctioning, which was detected by observing the time-series of sensor raw-signal and reference pollutant concentration.

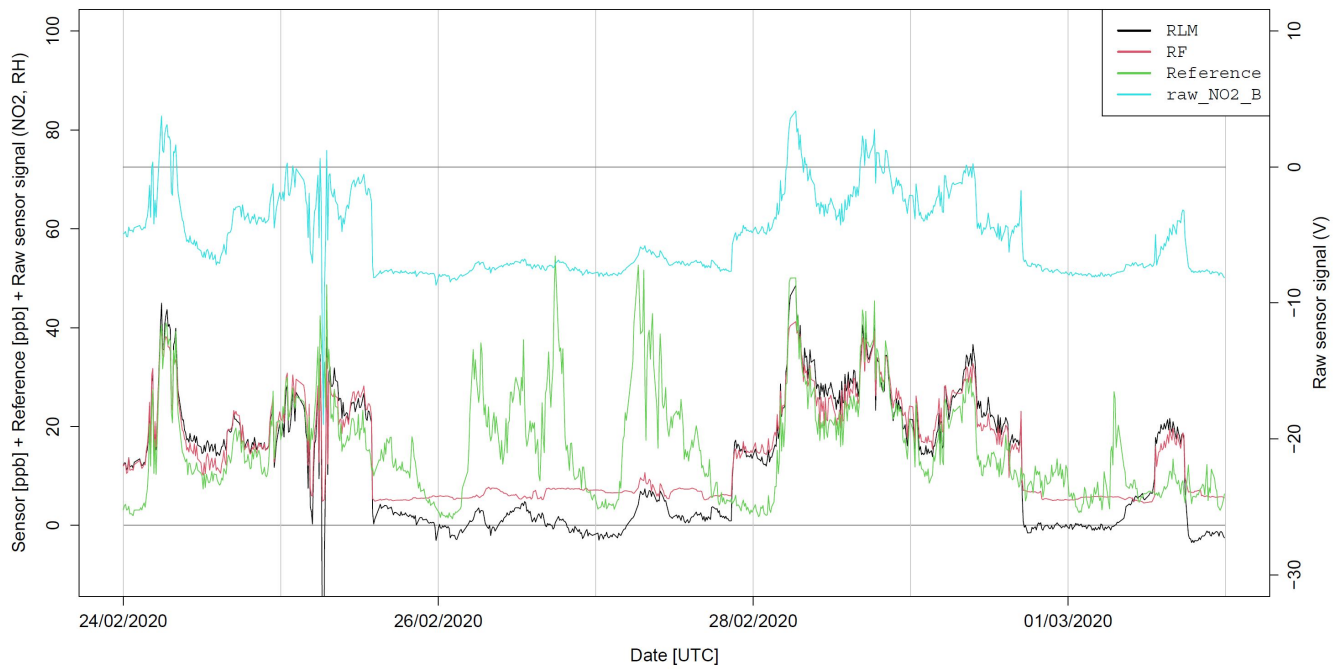

**Figure S15.** An example of sensor malfunctioning period from the NO<sub>2</sub>\_B sensor of AC010. From 2020-02-25 to 2020-02-28, raw signals of the sensor (raw\_NO<sub>2</sub>\_B) during the period did not show any dynamics as the reference data, thus the severe under-estimation is obtained in the model prediction.

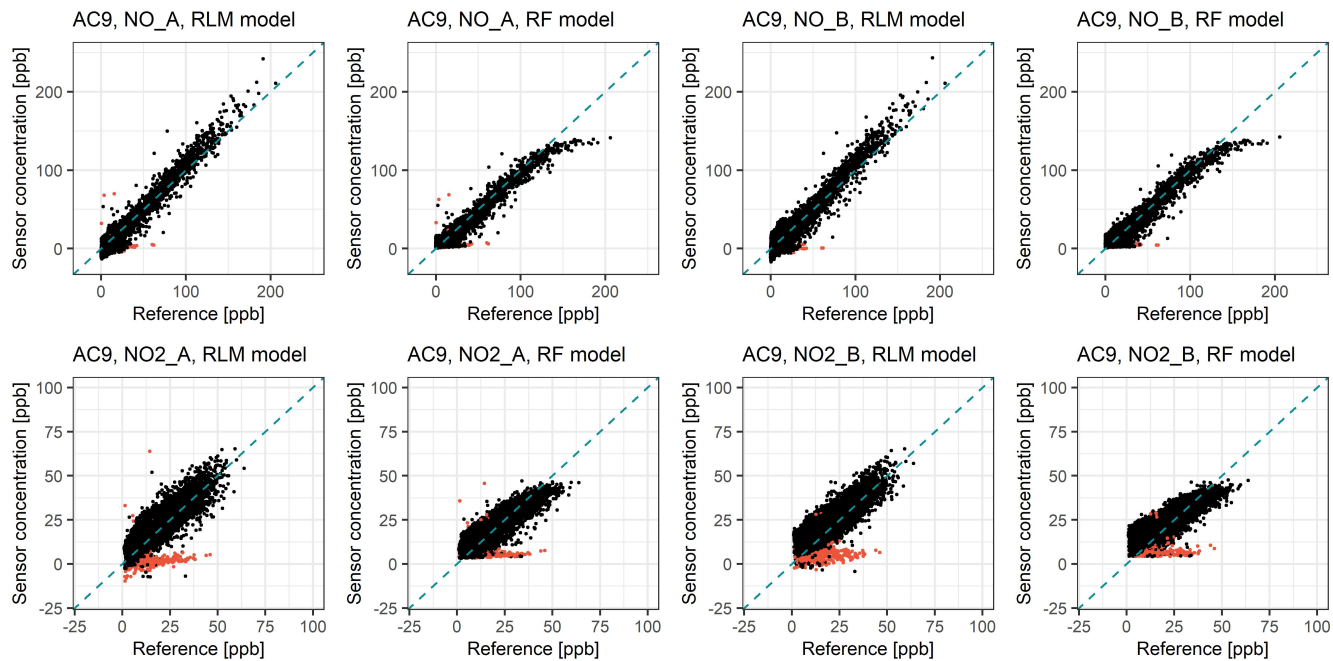

**Figure S16.** Filtered data points of AC009 during the second co-location period. Red-colored data points indicate the data which were eliminated by the sensor malfunction filtering process.

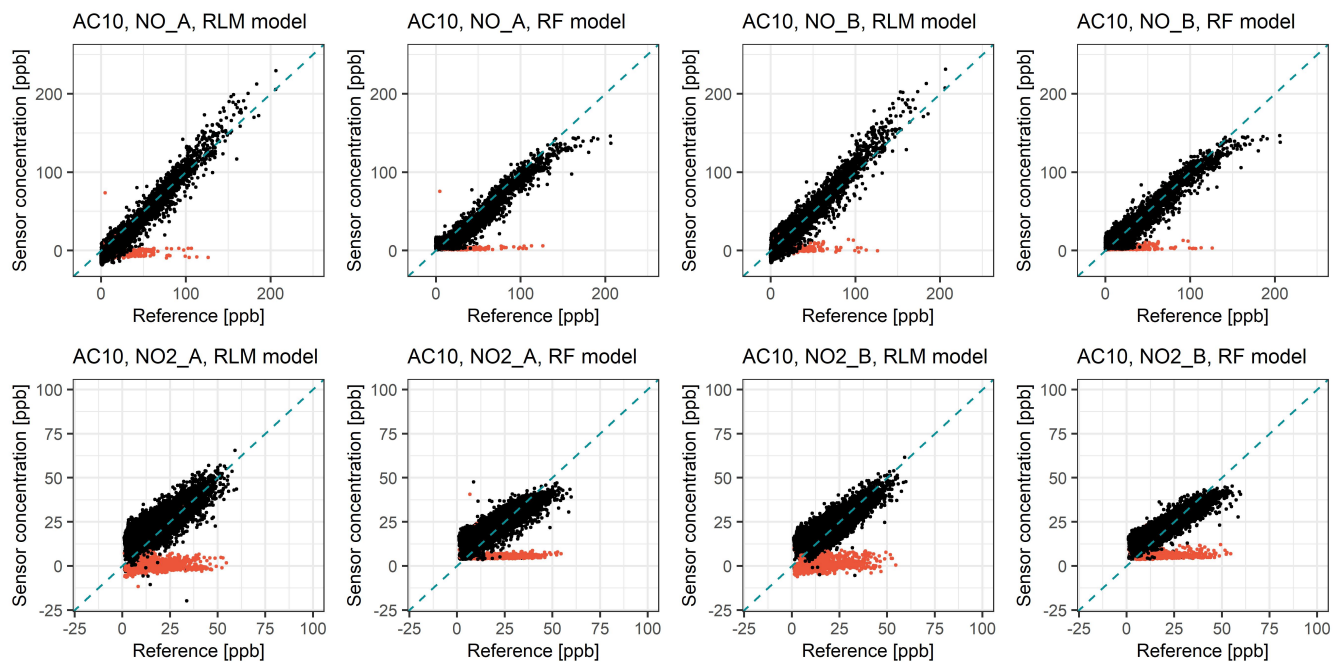

**Figure S17.** Filtered data points of AC010 during the second co-location period. Red-colored data points indicate the data which were eliminated by the sensor malfunction filtering process.



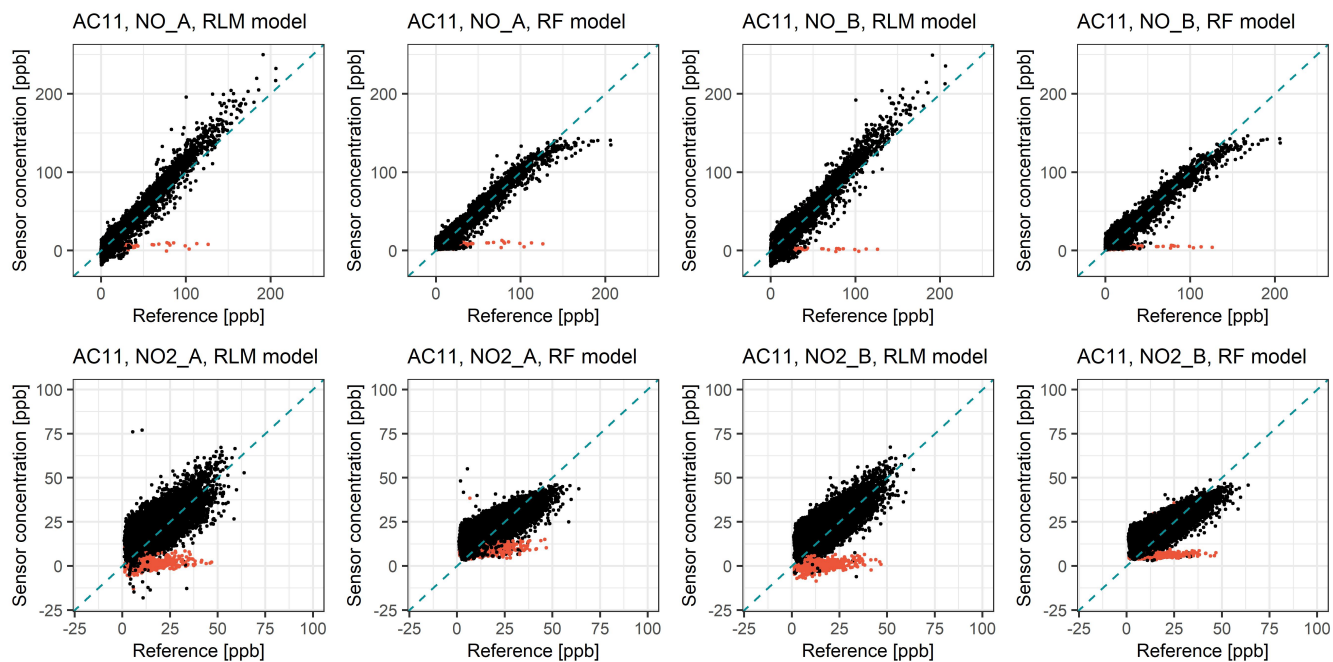

**Figure S18.** Filtered data points of AC011 during the second co-location period. Red-colored data points indicate the data which were eliminated by the sensor malfunction filtering process.

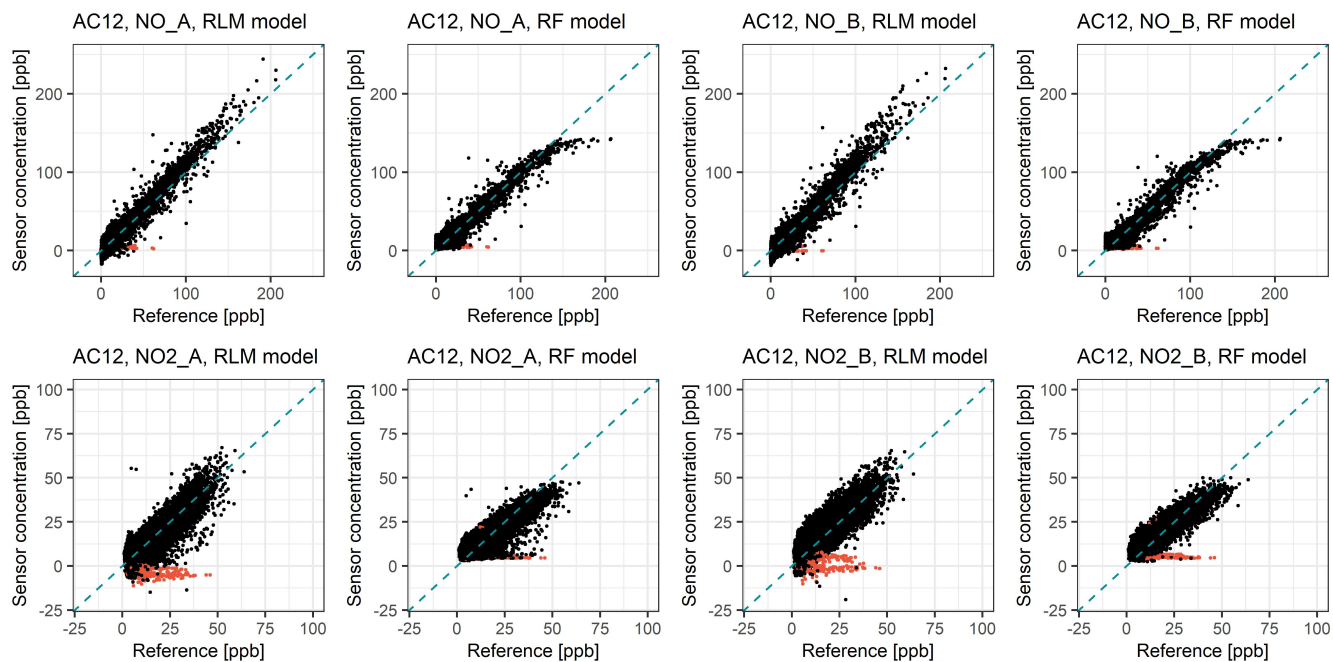

**Figure S19.** Filtered data points of AC012 during the second co-location period. Red-colored data points indicate the data which were eliminated by the sensor malfunction filtering process.
